# Supplementary material for: Anopheles gambiae larvae mount stronger immune responses against bacterial infection than adults: evidence of adaptive decoupling in mosquitoes
Source: PubMed Central journal article supplement (PMC5539753; doi:10.1186/s13071-017-2302-6), 2017-08-01
Supplement: 13071_2017_2302_MOESM2_ESM.pdf [file 13071_2017_2302_MOESM2_ESM.pdf]

Additional file 2: Table S1. Gene names, VectorBase gene IDs, and primers used for quantitative RT-PCR.

| Protein                         | Gene            | VectorBase ID * | Assembly | Forward primer (5'→3') | Reverse primer (5'→3') | Amplicon (bp) |         |
|---------------------------------|-----------------|-----------------|----------|------------------------|------------------------|---------------|---------|
|                                 |                 |                 |          |                        |                        | Transcript    | Genomic |
| <b>Pathogen recognition</b>     |                 |                 |          |                        |                        |               |         |
| C-type lectin 4                 | <i>CTL4</i>     | AGAP005335      | AgamP4   | TACCCAAAACCTGTGCGTTT   | CTTTTCTGCGATCGTGTCTCAG | 207           | 273     |
| Fibrinogen-related protein 13   | <i>FREP13</i>   | AGAP011197      | AgamP3   | TTGTGATGAAGGAGCACAGC   | GTGGTTGGAGCAGATGGTTT   | 176           | 176     |
| Gram (-) binding pr. 4          | <i>GNBPB4</i>   | AGAP002796      | AgamP3   | TCAAGGACGGCATCTTCTTC   | TCGGGTTGAGGTAGTTCGTT   | 174           | 250     |
| Thioester-containing protein 1  | <i>TEP1</i>     | AGAP010815      | AgamP4   | GACGTCCAAATACGGATCTCA  | CTTTCAGGCATCACCCGTAT   | 184           | 0       |
| Eater                           | <i>Eater</i>    | AGAP012386      | AgamP3   | TGGAGTTCGACGAGAGGTTTC  | TCGGTACGCATAAAACCATCA  | 124           | 199     |
| Nimrod **                       | <i>Nimrod</i>   | AGAP009762      | AgamP3   | AACGAAGGGACACATTCCTG   | CCGACTGAGAGATGGATTGG   | 121           | 179     |
| Draper                          | <i>Draper</i>   | AGAP007256      | AgamP3   | GTGACGAGCGTATGACGAAC   | GCCGGTAGTACAGCAGCATT   | 132           | 1862    |
| Croquemort                      | <i>SCRBQ2</i>   | AGAP010133      | AgamP3   | AGGACGTGGCATTTTGTACC   | TGGTTTGTTTTTCCACAGCA   | 177           | 281     |
| <b>Signal modulation</b>        |                 |                 |          |                        |                        |               |         |
| CLIPB 15                        | <i>CLIPB15</i>  | AGAP009844      | AgamP3   | CCGAACGATATCTGCATCCT   | GCTCCACGTGCTTCTGTGTA   | 184           | 274     |
| Serpin 6                        | <i>SRPN6</i>    | AGAP009212      | AgamP3   | AGCGTATGCATCAGCGGTAT   | TGGGCAGATCCTTCTGGTAG   | 195           | 279     |
| <b>Signal Transduction</b>      |                 |                 |          |                        |                        |               |         |
| MyD88                           | <i>MYD88</i>    | AGAP005252      | AgamP4   | ACCGCTGGTGTCTACCAATC   | TTGCTCCCGCAGTAGAAACT   | 196           | 269     |
| Cactus                          | <i>CACTUS</i>   | AGAP007938      | AgamP4   | GGATGATTCCAGACGAGGAG   | TCAGAAACTGCTGTGGAACG   | 204           | 318     |
| Casp1                           | <i>CASPL1</i>   | AGAP011693      | AgamP4   | TGCTAGAAGCGCTGACCATA   | GGGGCAAAAGTAGTCGATTG   | 217           | 217     |
| Caspar                          | <i>CASPAR</i>   | AGAP006473      | AgamP4   | CCGATCATCAATCAGCAGAA   | GTGCAGATAGATCGCCAACA   | 204           | 647     |
| Stat-A                          | <i>AGSTAT-A</i> | AGAP010423      | AgamP4   | CCTTGGAACAGGAAGAGCTG   | ACGACCTACCCGTGCACTAA   | 218           | 218     |
| Pias                            | <i>PIAS</i>     | AGAP005031      | AgamP4   | ATCGACGTGCTCCCATCTAC   | CCAGGAACCATCTTTGTGGA   | 205           | 294     |
| <b>Immune effectors</b>         |                 |                 |          |                        |                        |               |         |
| Cecropin A                      | <i>CECA</i>     | AGAP000693      | AgamP3   | GCTGAAGAAGCTGGGAAAGA   | ATGTTAGCAGAGCCGTCGTC   | 158           | 247     |
| Gambicin 1                      | <i>GAM1</i>     | AGAP008645      | AgamP3   | TGCGAGATGTAAAAGCATCG   | CAGCAGAGCTCCACTCAGAA   | 174           | 273     |
| Defensin 1                      | <i>DEF1</i>     | AGAP011294      | AgamP3   | GCAACGATCGTCTGTACCATT  | GCTTGGCCCGATAGTTCTC    | 175           | 275     |
| Phenoloxidase 1                 | <i>PPO1</i>     | AGAP002825      | AgamP4   | CACCATCATGATCGAGAACG   | GGAATTGTGACGGTGGATTTC  | 207           | 296     |
| Phenoloxidase 6                 | <i>PPO6</i>     | AGAP004977      | AgamP3   | AGAGCCACTACCGGAAGGAT   | TCGATGCTCTCAGCAATACG   | 174           | 242     |
| Lysozyme C1                     | <i>LYSC1</i>    | AGAP007347      | AgamP3   | ACGGCATCTTCCAGATCAAC   | CATTGCAGTGGTTCTTCCAG   | 180           | 259     |
| Nitric oxide synthase           | <i>NOS</i>      | AGAP008255      | AgamP3   | CAAGAGTGGGACCACATCAA   | ACCCTTCTGGACCATCTCCT   | 129           | 210     |
| Dual oxidase                    | <i>DUOX</i>     | AGAP009978      | AgamP3   | TTTACCGGGCTAAAAGCAGT   | ATTTGCGGCTCTTGTTCACT   | 175           | 251     |
| <b>Ecdysteroid biosynthesis</b> |                 |                 |          |                        |                        |               |         |
| CYP302A1                        | <i>CYP302A1</i> | AGAP005992      | AgamP4   | CATCCTGCCACCACCA       | CCAAACGGAAGCACCAGGT    | 201           | 270     |
| CYP315A1                        | <i>CYP315A1</i> | AGAP000284      | AgamP4   | CGAAGCGGAGTGCCTGTGT    | CGTCTGTGCGTTTGCTATTC   | 202           | 274     |
| <b>Ribosomal genes</b>          |                 |                 |          |                        |                        |               |         |
| Ribosomal pr. 17                | <i>RPS17</i>    | AGAP004887      | AgamP3   | GACGAAACCACTGCGTAAACA  | TGCTCCAGTGCTGAAACATC   | 153           | 264     |
| Ribosomal pr. 7                 | <i>RPS7</i>     | AGAP010592      | AgamP3   | GACGGATCCCAGCTGATAAA   | GTCTCTGGGAATTCGAACG    | 132           | 281     |

\* VectorBase PEST strain genomic sequence ([www.vectorbase.org](http://www.vectorbase.org))

\*\* In AgamP4, AGAP009762 was renamed AGAP029054.

GP League, TY Estévez-Lao, Y Yan, VA Garcia-Lopez, and JF Hillyer. 2017. *Parasites & Vectors*
