# Supplementary material for: Anopheles gambiae larvae mount stronger immune responses against bacterial infection than adults: evidence of adaptive decoupling in mosquitoes
Source: PubMed Central journal article supplement (PMC5539753; doi:10.1186/s13071-017-2302-6), 2017-08-01
Supplement: 13071_2017_2302_MOESM3_ESM.pdf [file 13071_2017_2302_MOESM3_ESM.pdf]

## *Anopheles gambiae* larvae mount stronger immune responses against bacterial infection than adults: evidence of adaptive decoupling in mosquitoes

Garrett P. League, Tania Y. Estévez-Lao, Yan Yan, Valeria A. Garcia-Lopez, and Julián F. Hillyer

Department of Biological Sciences, Vanderbilt University, Nashville, TN, U.S.A.

julian.hillyer@vanderbilt.edu

*Parasites & Vectors*, 2017

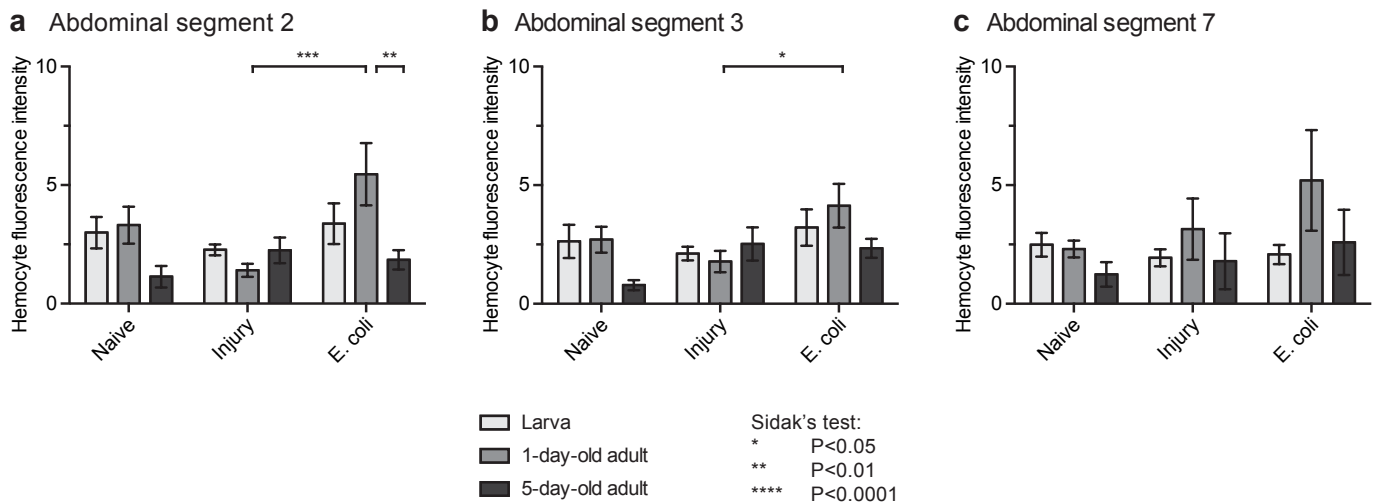

**Additional file 3: Figure S2.** Sessile hemocytes are present in abdominal segments 2, 3 and 7.

Fluorescence intensity of CM-DiI-stained hemocytes in abdominal segments 2 (**a**), 3 (**b**), and 7 (**c**) of naïve, injured, and *E. coli*-infected larvae, 1-day-old adults and 5-day-old adults at 24 h post-treatment. Quantitative data were analyzed by two-way ANOVA, followed by Šidák's *post-hoc* test. Whiskers denote the SEM. Data for abdominal segments 4, 5, 6 and 8 are presented in Fig. 3.
