# Supplementary material for: Anopheles gambiae larvae mount stronger immune responses against bacterial infection than adults: evidence of adaptive decoupling in mosquitoes
Source: PubMed Central journal article supplement (PMC5539753; doi:10.1186/s13071-017-2302-6), 2017-08-01
Supplement: 13071_2017_2302_MOESM7_ESM.pdf [file 13071_2017_2302_MOESM7_ESM.pdf]

# *Anopheles gambiae* larvae mount stronger immune responses against bacterial infection than adults: evidence of adaptive decoupling in mosquitoes

Garrett P. League, Tania Y. Estévez-Lao, Yan Yan, Valeria A. Garcia-Lopez, and Julián F. Hillyer  
 Department of Biological Sciences, Vanderbilt University, Nashville, TN, U.S.A.

julian.hillyer@vanderbilt.edu

*Parasites & Vectors*, 2017

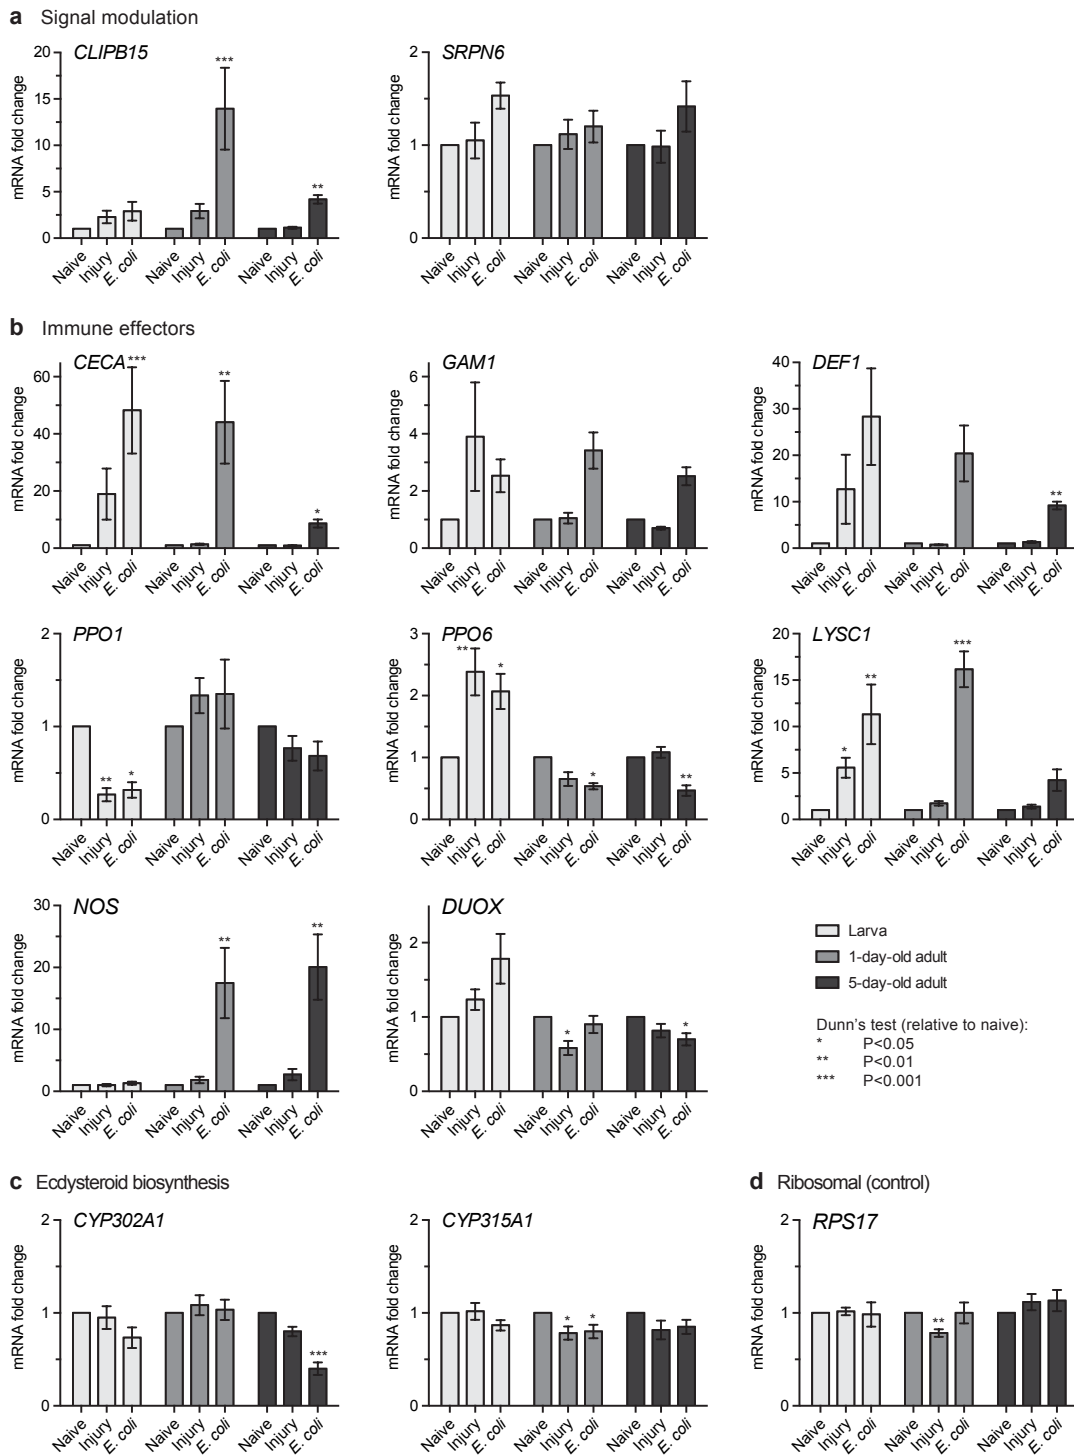

**Additional file 7: Figure S6.** Relative expression of signal modulation, immune effector, ecdysteroid biosynthesis, and ribosomal genes. Graphs show the average mRNA fold change of signal modulation (**a**), immune effector (**b**), ecdysteroid biosynthesis (**c**) and ribosomal (**d**) genes in naïve, injured, and *E. coli*-infected larvae, 1-day-old adults, and 5-day-old adults at 24 h post-treatment relative to the naïve group of a given life stage or adult age. Whiskers denote the SEM. Asterisks denote the significant regulation of mRNA levels relative to the naïve group as determined by the Kruskal-Wallis test, followed by Dunn's *post-hoc* test (\*,  $P < 0.05$ ; \*\*,  $P < 0.01$ ; \*\*\*,  $P < 0.001$ ; \*\*\*\*,  $P < 0.0001$ ).
